# Supplementary material
Source: Springer Nature journal article supplement (http://www.springermedizin.de/resource/supplementary/13023_2012_540_MOESM3_ESM.pdf/9642698)

### %CIDD Score -Average Course-

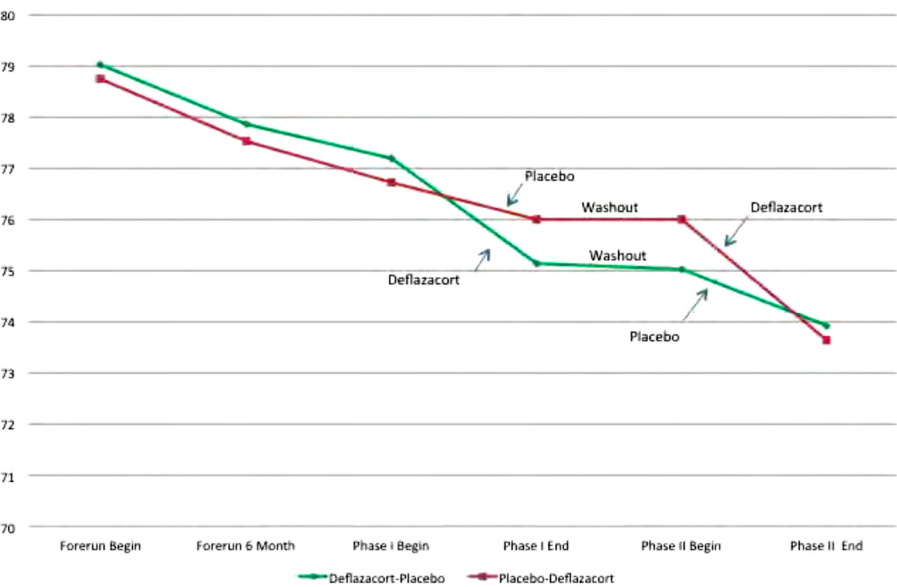

**b**

### %CIDD-Score: Absolute Change (post-prā)

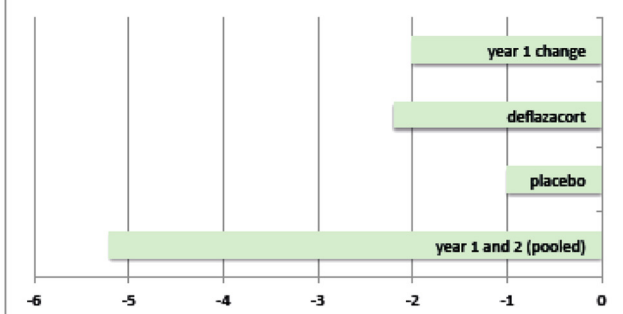

**c**

### %CIDD-Score (mutation correlated) -Average Course-

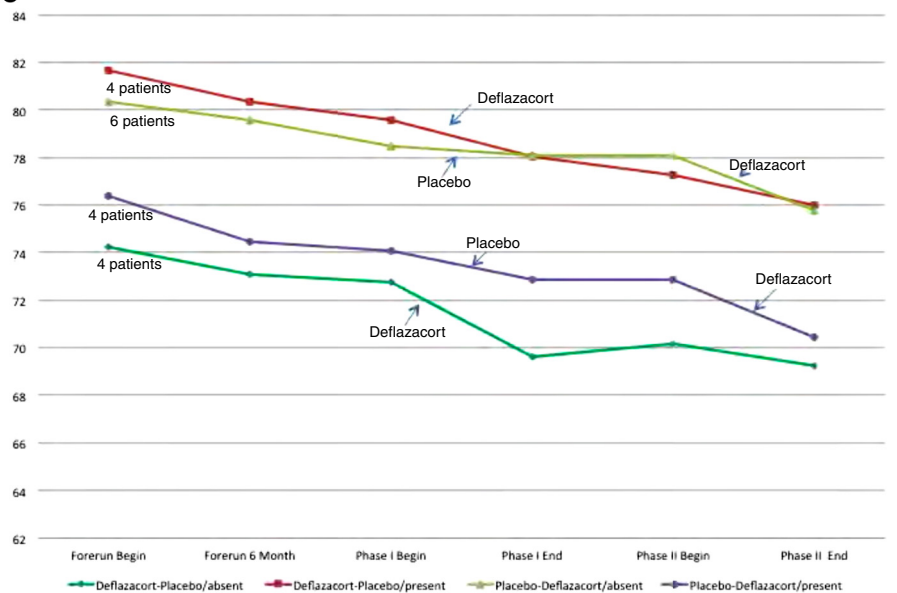

Supplement: MOESM3 [file 9642698]
